# Supplementary material for: The Social Validity of Telepractice among Spanish-Speaking Caregivers of English Learners: An Examination of Moderators
Source: PubMed Central journal article supplement (PMC5716612; doi:10.5195/ijt.2017.6227), 2017-11-20
Supplement: ijt-09-13-s01.pdf [file ijt-09-13-s01.pdf]

**International Journal of Telerehabilitation 10.5195/ijt.2017.6227 –Supplemental File**

Child age:

---

Relation to child:

---

Current city and state:

---

What country (or state) is your family from?

---

Where was your child born?

---

1. Please indicate: How many years of school have you had?

- Elementary school
- Some high school
- Graduated high school
- Some college
- Graduated college
- Finished graduate school
- Other - please specify: \_\_\_\_\_

2. Please mark the box that indicates: What is **your** fluency level **in...**

| <b>...Spanish?</b> |      |         |          |          |        |              |
|--------------------|------|---------|----------|----------|--------|--------------|
|                    | None | Minimal | Passable | Adequate | Strong | Fully fluent |
| <b>Listening</b>   |      |         |          |          |        |              |
| <b>Speaking</b>    |      |         |          |          |        |              |
| <b>Reading</b>     |      |         |          |          |        |              |
| <b>Writing</b>     |      |         |          |          |        |              |

| <b>...English?</b> |      |         |          |          |        |              |
|--------------------|------|---------|----------|----------|--------|--------------|
|                    | None | Minimal | Passable | Adequate | Strong | Fully fluent |
| <b>Listening</b>   |      |         |          |          |        |              |
| <b>Speaking</b>    |      |         |          |          |        |              |

|                |  |  |  |  |  |  |
|----------------|--|--|--|--|--|--|
| <b>Reading</b> |  |  |  |  |  |  |
| <b>Writing</b> |  |  |  |  |  |  |

3. What is your **child's** fluency level in...

| <b>...Spanish?</b> |      |         |          |          |        |              |
|--------------------|------|---------|----------|----------|--------|--------------|
|                    | None | Minimal | Passable | Adequate | Strong | Fully fluent |
| <b>Listening</b>   |      |         |          |          |        |              |
| <b>Speaking</b>    |      |         |          |          |        |              |

| <b>...English?</b> |      |         |          |          |        |              |
|--------------------|------|---------|----------|----------|--------|--------------|
|                    | None | Minimal | Passable | Adequate | Strong | Fully fluent |
| <b>Listening</b>   |      |         |          |          |        |              |
| <b>Speaking</b>    |      |         |          |          |        |              |

4. How important is it to you...

|                                                     | <b>Not important</b> | <b>A Little important</b> | <b>Moderately Important</b> | <b>Considerably Important</b> | <b>Very important</b> |
|-----------------------------------------------------|----------------------|---------------------------|-----------------------------|-------------------------------|-----------------------|
| <b>...for your child to be bilingual?</b>           |                      |                           |                             |                               |                       |
| <b>...for your child to speak Spanish?</b>          |                      |                           |                             |                               |                       |
| <b>...for your child to speak English?</b>          |                      |                           |                             |                               |                       |
| <b>...to participate in your child's schooling?</b> |                      |                           |                             |                               |                       |
| <b>... to be bilingual in the United States?</b>    |                      |                           |                             |                               |                       |
| <b>... to speak English in the United States?</b>   |                      |                           |                             |                               |                       |

5. Have you heard of telepractice (distance therapy)?

Yes / No

If yes, please explain: \_\_\_\_\_  
 \_\_\_\_\_  
 \_\_\_\_\_

6. "Telepractice" is the **use of technology to deliver services**, whether medical, educational, etc., **remotely**. One example of "telepractice" is a psychologist having a counseling session with a client over the phone. Another example is a speech therapist providing therapy over Skype. Telepractice can involve a variety of technologies, such as phone, Facetime, and videoconferencing.

Telepractice can also be used to provide intervention to children. Intervention can be provided directly to the child or to a caregiver to support the child's learning. For example, a therapist could give directions and coach a caregiver to provide therapy to a child. This form of intervention is a very effective strategy according to much research. If your child were to need therapy services, **would you be interested in him/her receiving services via telepractice?** Why or why not?

Yes / No

Why or why not?: \_\_\_\_\_  
 \_\_\_\_\_

7. Imagine this situation: you live an hour away from a big city. You recently discovered that your child has a disorder and needs help from a tutor or speech therapist. In the city, there is a bilingual therapist that offers telepractice services over videoconferencing that your child could receive in your home. The bilingual therapist also offers in-person services in the city. In your town, there is a therapist that only speaks English. **Which option will you choose?** All the options cost the same.

- The bilingual therapist's services in person in the city
- The bilingual therapist's services over telepractice
- The bilingual therapist's services half in person and half over telepractice
- The services of the therapist who speaks English

8. In your opinion, what are the benefits of receiving services via telepractice?

\_\_\_\_\_  
 \_\_\_\_\_

9. Please indicate the level of access you have to the following technologies:

|                       | No access | Limited access | Reliable access | Unlimited access |
|-----------------------|-----------|----------------|-----------------|------------------|
| <b>Cordless Phone</b> |           |                |                 |                  |
| <b>Computer</b>       |           |                |                 |                  |
| <b>Internet</b>       |           |                |                 |                  |
| <b>Web Camera</b>     |           |                |                 |                  |

10. Please indicate the level of ability/comfort you have with the following technologies:

|                       | No ability | Limited ability | Moderate | Much ability |
|-----------------------|------------|-----------------|----------|--------------|
| <b>Cordless Phone</b> |            |                 |          |              |
| <b>Computer</b>       |            |                 |          |              |
| <b>Internet</b>       |            |                 |          |              |
| <b>Web Camera</b>     |            |                 |          |              |

11. Please indicate your agreement with the following phrases:

a) I don't have a computer. I can't receive services by telepractice.

- |                                               |                                                  |
|-----------------------------------------------|--------------------------------------------------|
| <input type="checkbox"/> I completely agree   | <input type="checkbox"/> I more or less disagree |
| <input type="checkbox"/> I more or less agree | <input type="checkbox"/> I disagree              |
| <input type="checkbox"/> I am unsure          |                                                  |

b) My child has no interest in technology and won't pay attention to telepractice services.

- |                                               |                                                  |
|-----------------------------------------------|--------------------------------------------------|
| <input type="checkbox"/> I completely agree   | <input type="checkbox"/> I more or less disagree |
| <input type="checkbox"/> I more or less agree | <input type="checkbox"/> I disagree              |
| <input type="checkbox"/> I am unsure          |                                                  |

c) Telepractice services are not as good as services in person.

- |                                               |                                                  |
|-----------------------------------------------|--------------------------------------------------|
| <input type="checkbox"/> I completely agree   | <input type="checkbox"/> I more or less disagree |
| <input type="checkbox"/> I more or less agree | <input type="checkbox"/> I disagree              |
| <input type="checkbox"/> I am unsure          |                                                  |

d) Telepractice isn't legal.

- |                                             |                                                  |
|---------------------------------------------|--------------------------------------------------|
| <input type="checkbox"/> I completely agree | <input type="checkbox"/> I more or less disagree |
|---------------------------------------------|--------------------------------------------------|

- I more or less agree
- I disagree
- I am unsure

12. What goals do you have for your child in school?

---



---

13. Have you received any information from anyone regarding intervention in Spanish versus English? If yes, what information have you received? Who gave you the information?

Yes / No

---



---

14. Ideally, who would deliver services to your child? In what language would he/she speak?

Preferred language: \_\_\_\_\_

Explanation: \_\_\_\_\_

---

15. Please mark the boxes to indicate in what language...

|                                                      | Spanish | More Spanish and less English | Spanish and English | More English and less Spanish | English |
|------------------------------------------------------|---------|-------------------------------|---------------------|-------------------------------|---------|
| ...do you speak at home?                             |         |                               |                     |                               |         |
| ...does your child speak at home?                    |         |                               |                     |                               |         |
| ...does your child speak with others?                |         |                               |                     |                               |         |
| ... do you speak with your child at school?          |         |                               |                     |                               |         |
| ... do you speak with your child at the supermarket? |         |                               |                     |                               |         |

16. Please indicate by circling: Does your child have a diagnosed speech or language disorder or receive special services at school?

Yes (continue to the next page)

No (end questionnaire)

If unsure – end questionnaire

**Questions for families of children with diagnosed speech/language impairment:**

17. Has your child received services of a speech-language pathologist (or speech therapist) before today?  
If your child has received services, what language were the services delivered in?

Yes / No Language: \_\_\_\_\_

18. Have you had difficulty obtaining services of a bilingual therapist? If yes, what difficulties have you experienced?

Yes / No

---



---

19. According to you, what is your child's principal speech and language problem?

---



---

20. Please mark the box to indicate the severity of your child's speech/language disorder.

| Very mild | Mild | Mild-moderate | Moderately-severe | Severe | Very severe/profound |
|-----------|------|---------------|-------------------|--------|----------------------|
|           |      |               |                   |        |                      |

21. Would you be interested in your child receiving speech and language intervention in Spanish?

Yes / No

Thank you for participating!
